# Supplementary material for: Identifying the presence of atrial fibrillation during sinus rhythm using a dual-input mixed neural network with ECG coloring technology
Source: PubMed Central journal article supplement — BMC Med Res Methodol. 2024 Dec 23;24:318. doi: 10.1186/s12874-024-02421-0 (PMC11665121; doi:10.1186/s12874-024-02421-0), 2024-12-23
Supplement: 12874_2024_2421_MOESM1_ESM.pdf [file 12874_2024_2421_MOESM1_ESM.pdf]

## Supplementary Information

---

The CHA<sub>2</sub>DS<sub>2</sub>-VAS<sub>c</sub> score is a clinical tool used to assess the likelihood of stroke in individuals with non-rheumatic atrial fibrillation, a prevalent and severe heart rhythm disorder associated with thromboembolic strokes. This scoring system aids in determining the need for anticoagulation or antiplatelet therapy. Due to the potential for AF to cause blood stasis in the heart's upper chambers, a clot (mural thrombus) can form, leading to its dislodgment, traveling through the bloodstream, blocking the blood supply to the brain, and resulting in a stroke. A higher CHA<sub>2</sub>DS<sub>2</sub>-VAS<sub>c</sub> score indicates an increased risk of stroke, whereas a lower score indicates a reduced risk of stroke.

**Table s1** CHA<sub>2</sub>DS<sub>2</sub>-VAS<sub>c</sub> Score

| Criteria                         |                               | Poss. Point |    |
|----------------------------------|-------------------------------|-------------|----|
| Congestive heart failure         |                               | +1          |    |
| Hypertension                     |                               | +1          |    |
| Age $\geq$ 75 years              | 65 $\leq$ Age $\leq$ 74 years | +2          | +1 |
| Diabetes mellitus                |                               | +1          |    |
| Stroke/transient ischemic attack |                               | +2          |    |
| Vascular disease                 |                               | +1          |    |
| Sex category (female gender)     |                               | +1          |    |
| Total Score                      |                               | 0-9         |    |
